# Supplementary material for: Controlling cobalt Fischer–Tropsch stability and selectivity through manganese titanate formation
Source: Royal Society of Chemistry journal article supplement (doi:10.1039/d3cy00030c), 2023-01-01
Supplement: d3cy00030c1.pdf [file d3cy00030c1.pdf]

## Supporting Information

### Controlling Cobalt Fischer-Tropsch Stability and Selectivity through Manganese Titanate formation

James Paterson, David Brown, Sarah Haigh, Philip Landon, Qizhen Li, Mark Peacock, Hendrik van Rensburg, Zhuoran Xu

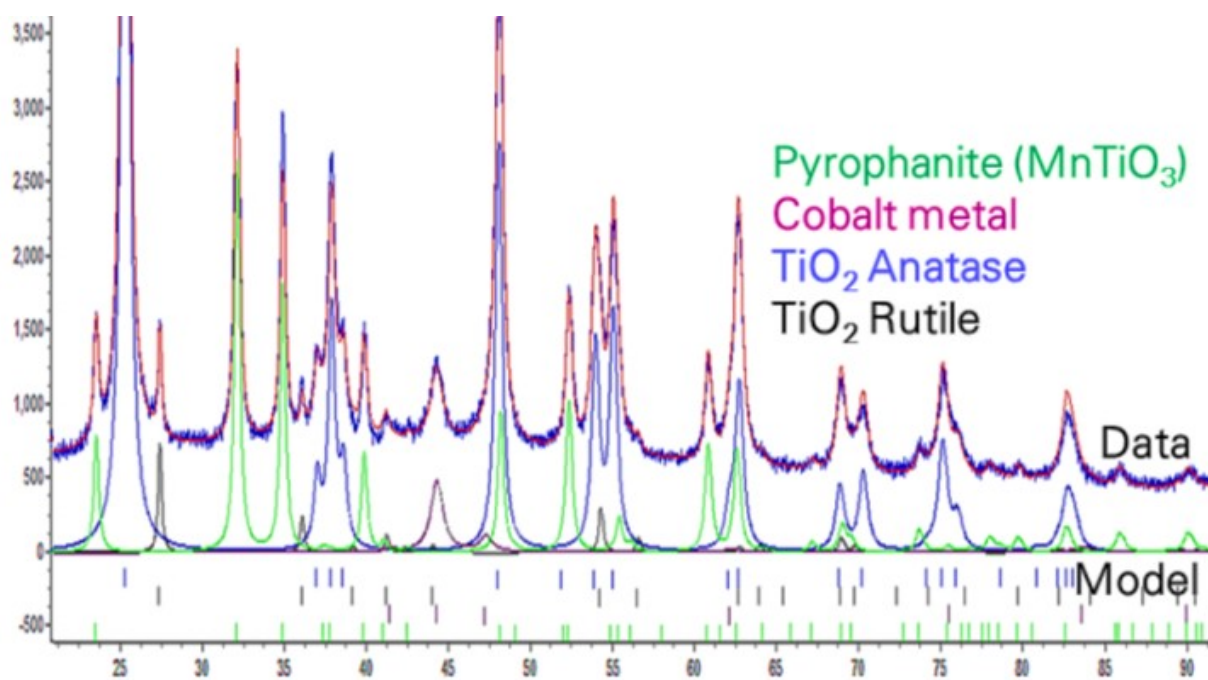

SI 1 – XRD pattern of the high temperature reduced CoMnTiO<sub>2</sub> sample, and the XRD modelled pattern for MnTiO<sub>3</sub>

|  | Rutile |                       | Co <sub>3</sub> O <sub>4</sub> |                       | CoO                   |                       | MnTiO                 |                       |
|--|--------|-----------------------|--------------------------------|-----------------------|-----------------------|-----------------------|-----------------------|-----------------------|
|  | e, Å   | % Wt/Wt Cryst Size, Å | % Wt/Wt Cryst Size, Å          | % Wt/Wt Cryst Size, Å | % Wt/Wt Cryst Size, Å | % Wt/Wt Cryst Size, Å | % Wt/Wt Cryst Size, Å | % Wt/Wt Cryst Size, Å |
|  | 12.5   | 295                   | 16.1                           | 73                    |                       |                       |                       |                       |
|  | 12.1   | 300                   | 7.1                            | 82                    | 7.1                   | 48                    |                       |                       |
|  | 12.1   | 314                   |                                |                       | 14.3                  | 51                    |                       |                       |
|  | 12.6   | 302                   |                                |                       | 8.0                   | 57                    |                       |                       |
|  | 13.2   | 314                   |                                |                       | 1.2                   | 92                    |                       |                       |
|  | 13.2   | 313                   |                                |                       |                       |                       |                       |                       |
|  |        |                       |                                |                       |                       |                       |                       |                       |
|  | 8.2    | 198                   | 20.6                           | 41                    |                       |                       |                       |                       |
|  | 8.1    | 209                   | 23.3                           | 39                    |                       |                       |                       |                       |
|  | 7.5    | 212                   | 20.2                           | 32                    | 3.9                   | 53                    |                       |                       |
|  | 7.1    | 230                   | 6.3                            | 25                    | 17.1                  | 52                    |                       |                       |

SI 2 – In situ XRD reduction data for the low and high manganese promoted samples. In particular showing the sudden onset of the MnTiO<sub>3</sub> phase at 450C (extended data from table in manuscript)

|              | T-Rx [°C] | GHSV [h <sup>-1</sup> ] | CO Conv [%] | Sel. CH <sub>4</sub> [%] | Sel C5+ [%] | Sel. C2-C4 [%] | Sel. CO <sub>2</sub> [%] | Total Alkenes [%] | 1-Butanol [%] | Total Alkanes [%] |
|--------------|-----------|-------------------------|-------------|--------------------------|-------------|----------------|--------------------------|-------------------|---------------|-------------------|
| 0%Mn         | 220       | 8825                    | 34.15       | 3.24                     | 91.90       | 3.93           | 0.01                     | 1.48              | 0.03          | 0.59              |
| 5%Mn         | 245       | 8823                    | 29.60       | 5.46                     | 71.24       | 22.86          | 0.04                     | 4.77              | 1.01          | 2.19              |
| 10%Mn (300C) | 243       | 8819                    | 28.03       | 6.50                     | 70.37       | 22.67          | 0.04                     | 3.71              | 1.13          | 2.60              |
| 10%Mn (450C) | 214       | 8821                    | 39.62       | 2.30                     | 92.92       | 3.96           | 0.00                     | 1.65              | 0.03          | 0.44              |

SI 3 – Summary data showing selectivity to C5+ products, alkenes and alcohols for the 10%Mn (450C) returning to a 0%Mn type level rather than matching the 10%Mn(300C) condition

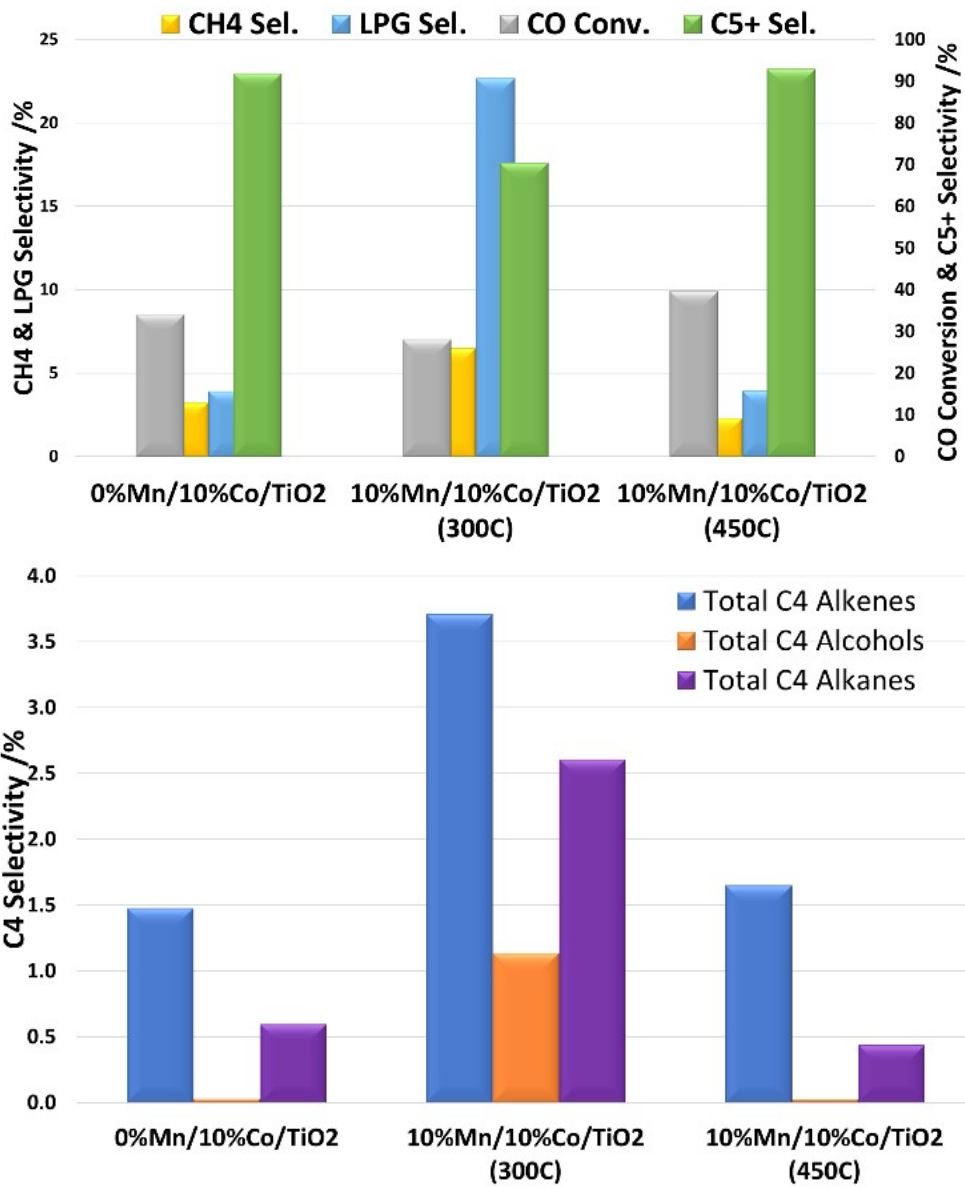

SI 4 – Graphical comparison of the data comparing the mon-manganese and the high manganese samples at 300C and 450C

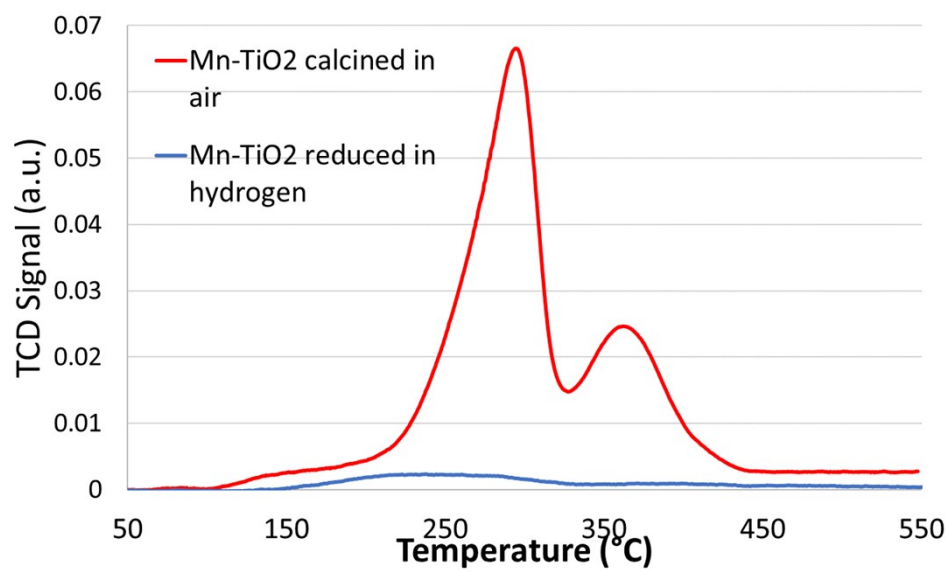

SI 5 - Temperature programmed reduction of the calcined and reduced manganese-titania ex situ support samples

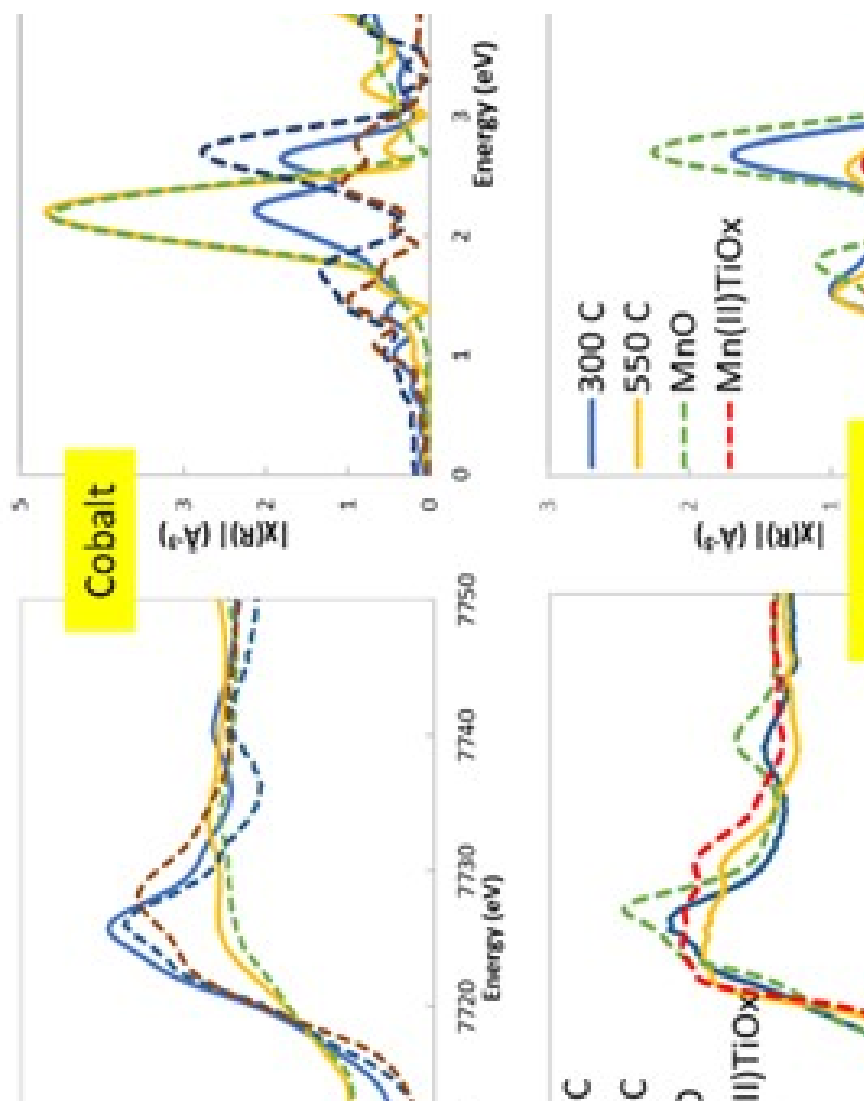

SI 6 - EXAFS and XANES images from manuscripts, expanded for clarity

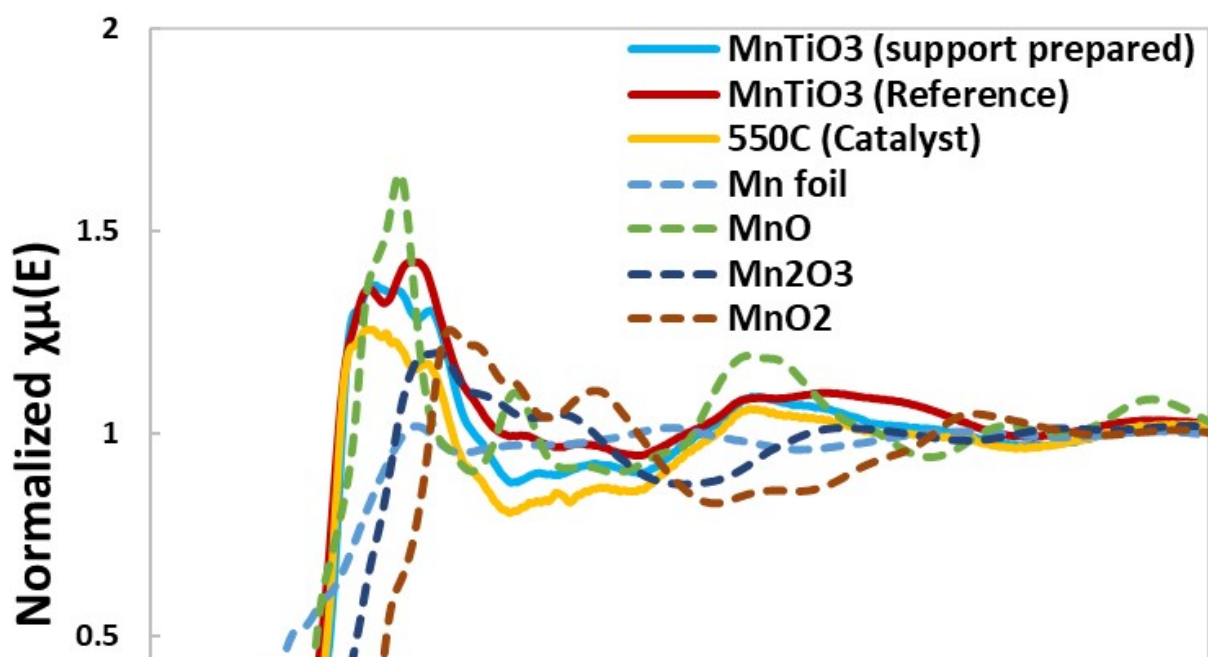

|                             |                                  | Mn-O/Å     | CN  | $\sigma^2$ | Mn-Mn/ Å | CN  | Mn-Ti/ Å | CN  | $\sigma^2$ |
|-----------------------------|----------------------------------|------------|-----|------------|----------|-----|----------|-----|------------|
| 10%Co/5%Mn/TiO <sub>2</sub> | 300 ° C                          | 2.10       | 5.6 | 0.010      | 3.12     | 4.8 | -        | -   | 0.009      |
|                             | 550 ° C                          | 2.12       | 5.1 | 0.010      | 3.06     | 3.9 | 3.41     | 2.5 | 0.007      |
| 10%Co/5%Mn/TiO <sub>2</sub> | 300 ° C                          | 2.12       | 4.6 | 0.007      | 3.12     | 7.3 | -        | -   | 0.009      |
|                             | 550 ° C                          | 2.12       | 5.7 | 0.011      | 3.05     | 4.5 | 3.43     | 3.0 | 0.008      |
| References                  | MnO                              | 2.22       | 6   | -          | 3.14     | 12  | -        | -   | -          |
|                             | Mn <sub>2</sub> O <sub>3</sub>   | 2.012      | 6   | -          | 3.13     | 6   | -        | -   | -          |
|                             | MnO <sub>2</sub>                 | 1.883      | 6   | -          | 3.418    | 8   | -        | -   | -          |
|                             | MnTiO <sub>3</sub>               | 2.11, 2.28 | 6   | -          | 3.063    | 3   | 3.433    | 3   | -          |
|                             | MnTi <sub>2</sub> O <sub>4</sub> | 2.041      | 4   | -          | 3.724    | 4   | -        | -   | -          |
| Ex situ Support             | (b) MnTiO <sub>3</sub>           | 2.11, 2.29 | 6   | 0.009      | 3.058    | 4.3 | 3.474    | 2.9 | 0.008      |

SI 7 – XAS analysis of samples with references, and comparison with the ex situ prepared support

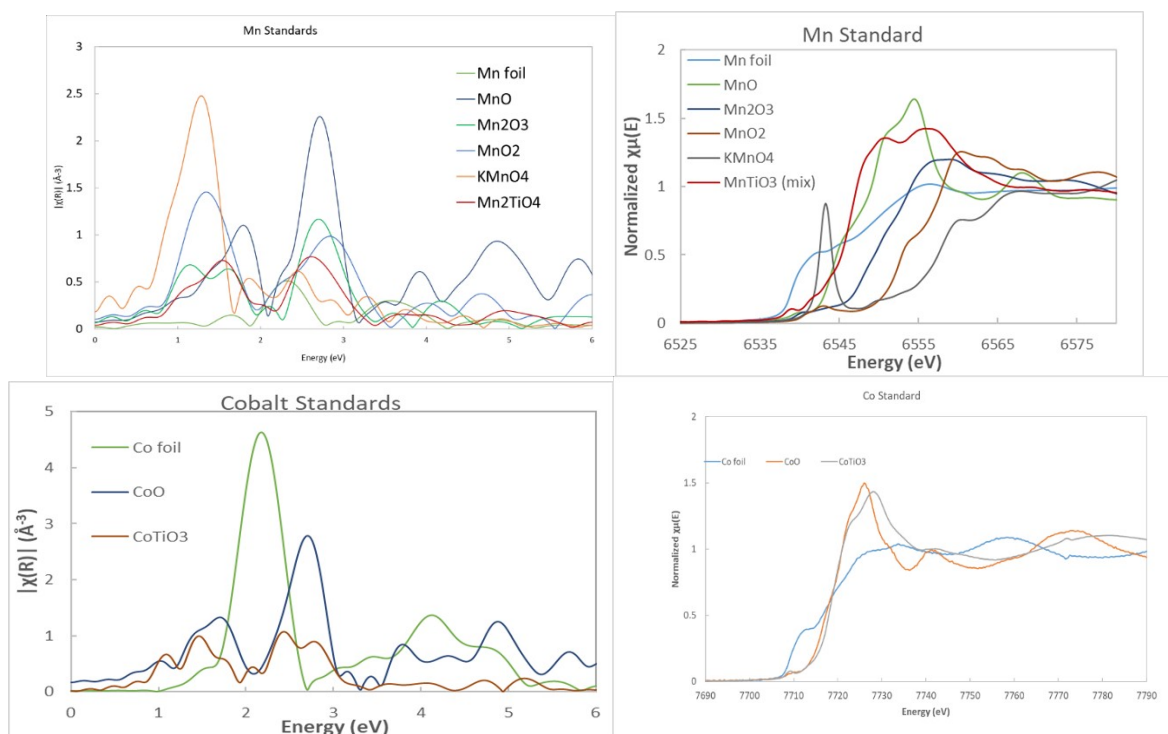

SI 9 - XAS Standards for EXAFS and XANES for manganese and cobalt edge species

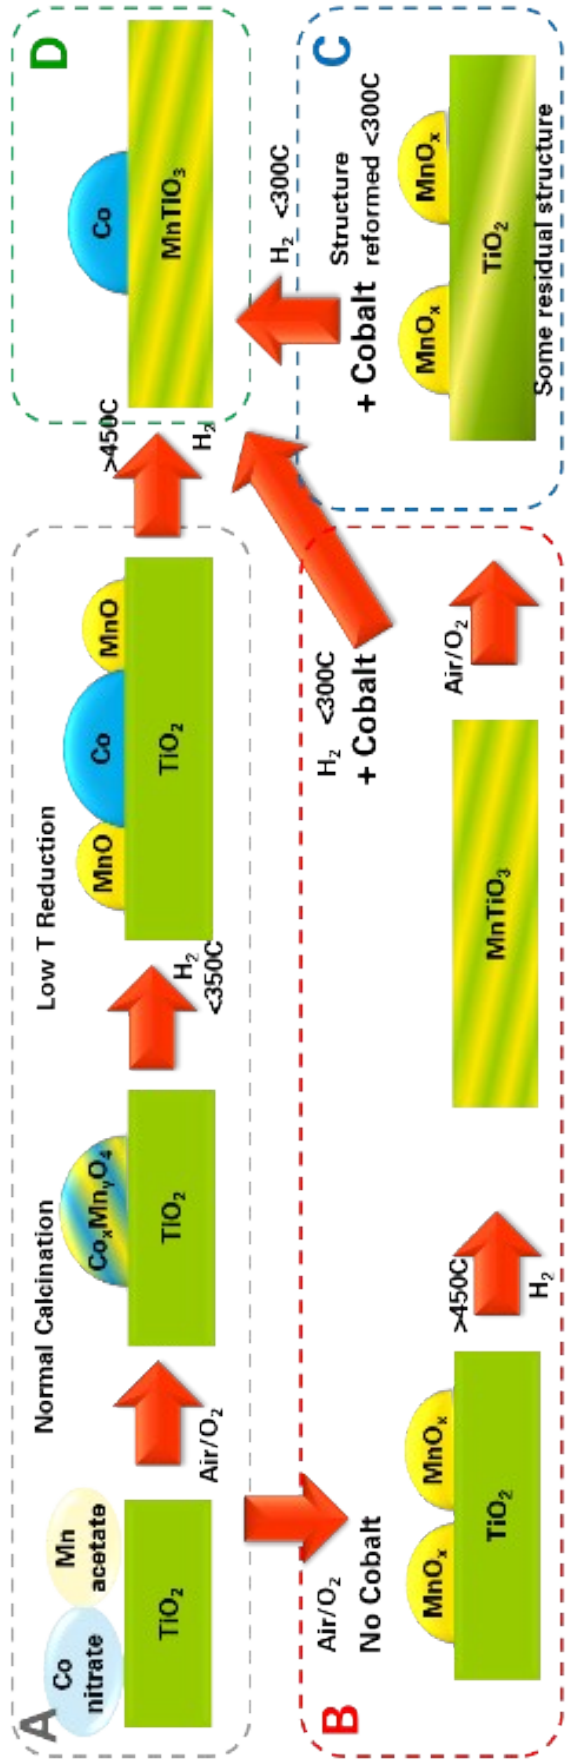



## SI 10 – Overview of the catalyst transitions

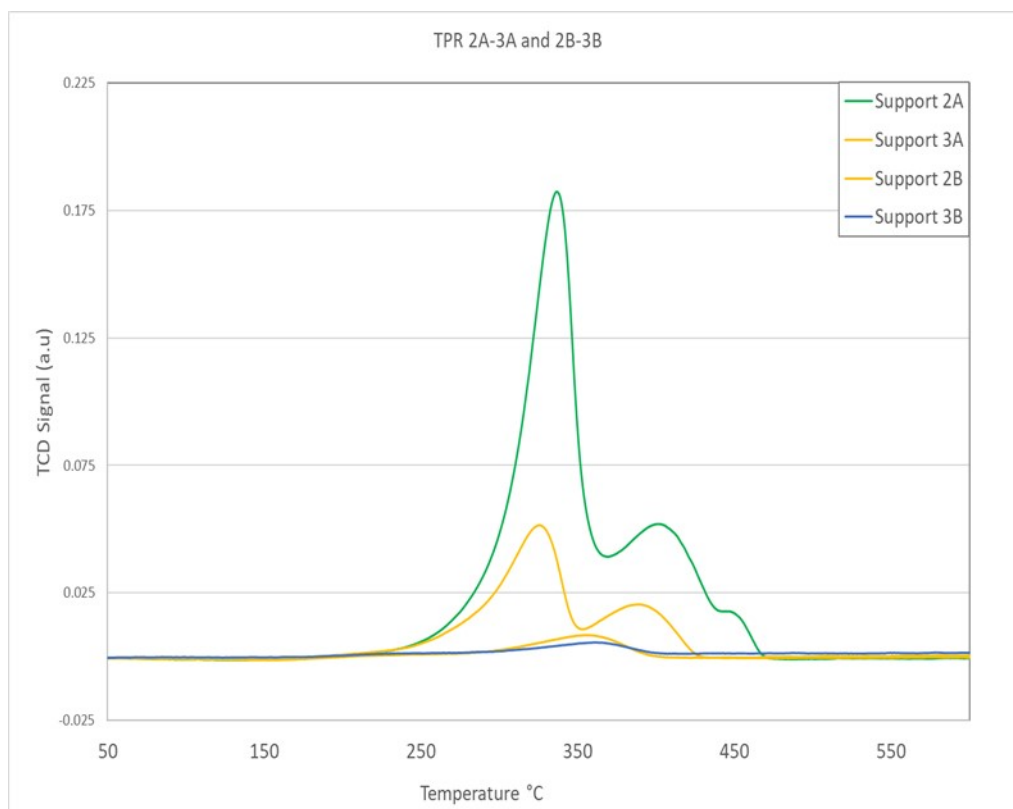

SI-11 Temperature programmed reduction of the oxidised support materials and reduced support materials. Reduced supports show very small amounts of hydrogen uptake (2B and 3B, 30%Mn:70%Ti, and 10%Mn:90%Ti). Of the oxide forms, some reduction is seen, likely from  $\text{MnO}_2$  to  $\text{MnO}$  initially, but also a small peak at 450°C which is likely to be the  $\text{MnTiO}_3$  transition. While there is no stoichiometry mass loss between  $\text{MnO}\cdot\text{TiO}_2$  and  $\text{MnTiO}_3$ , there is likely to be some reorganisation which forms this peak at 450°C.

A larger version of the images from the main manuscript:

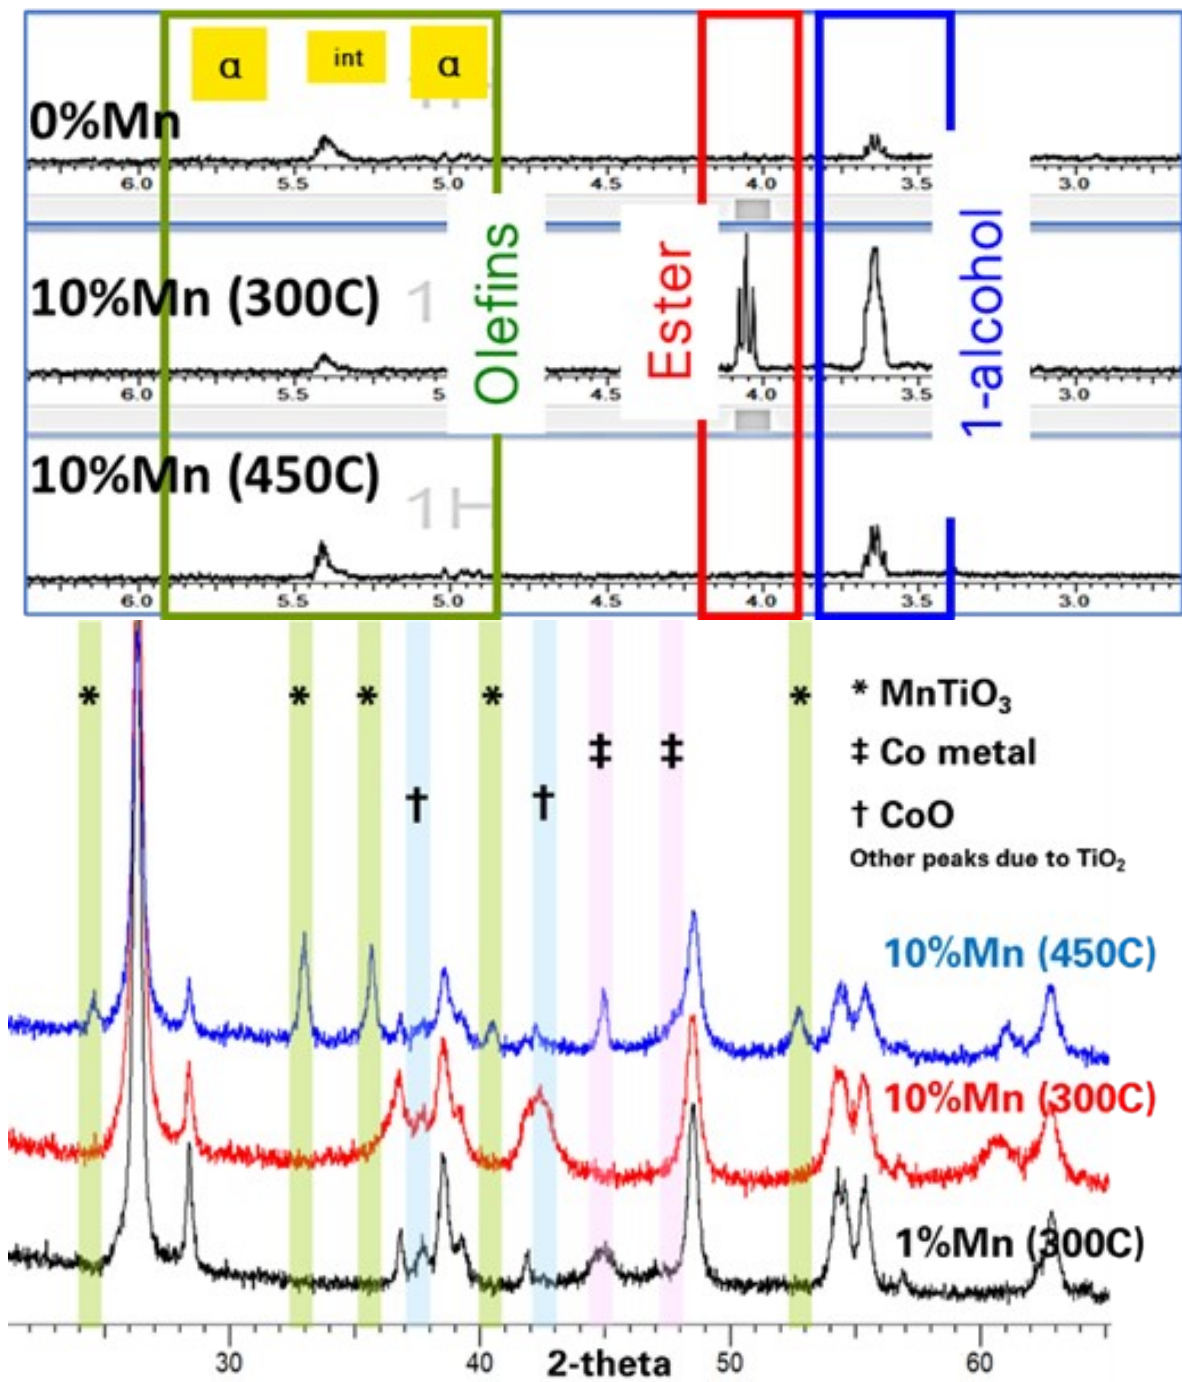

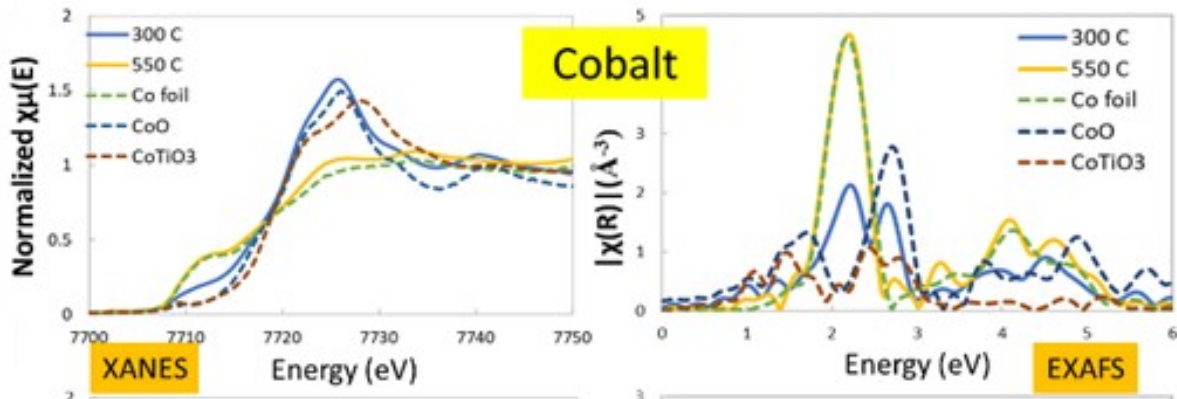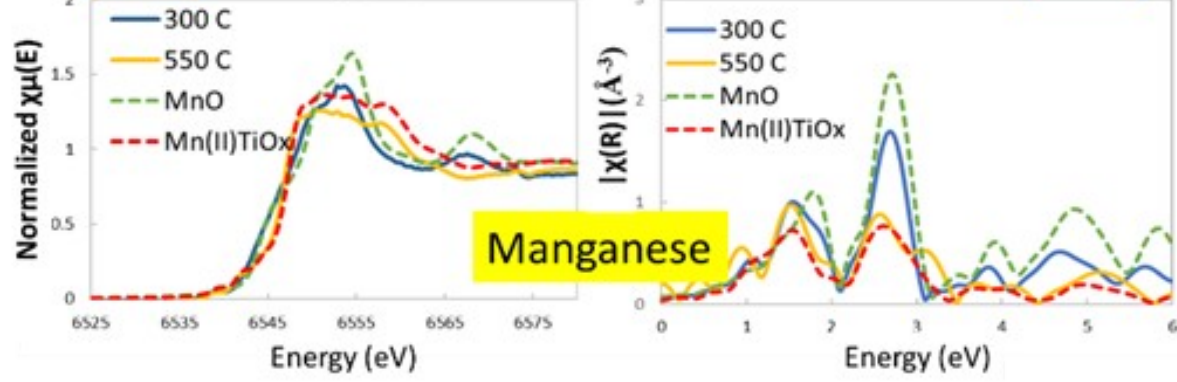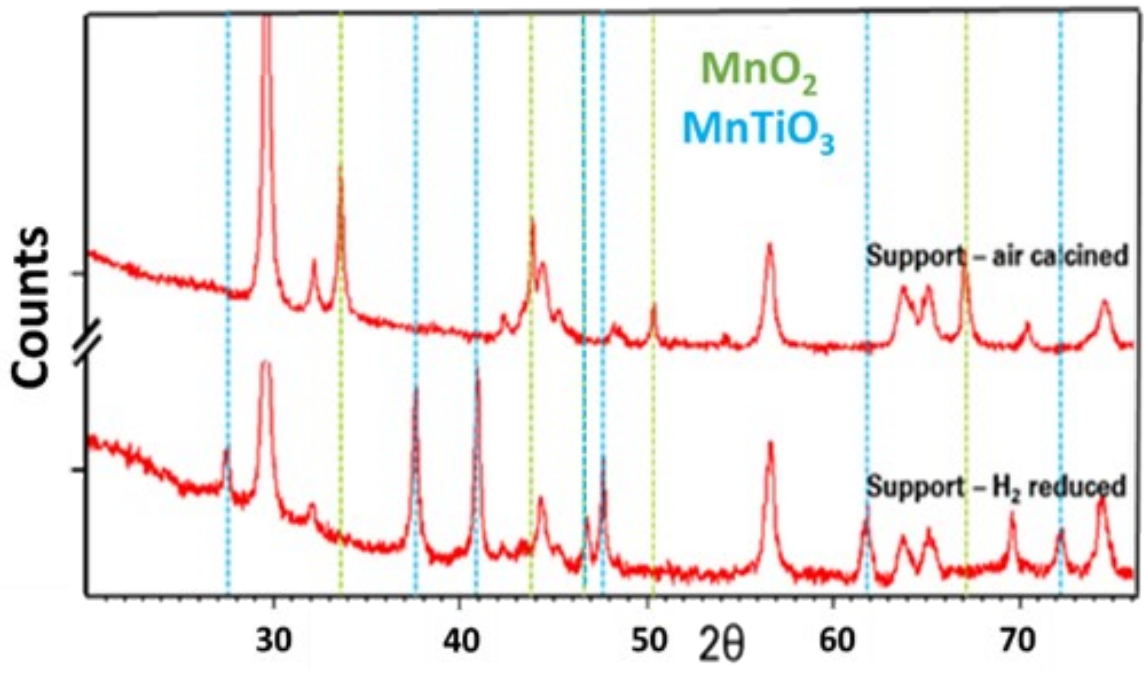

# 10%Co/10%Mn/TiO<sub>2</sub> – 500°C in air

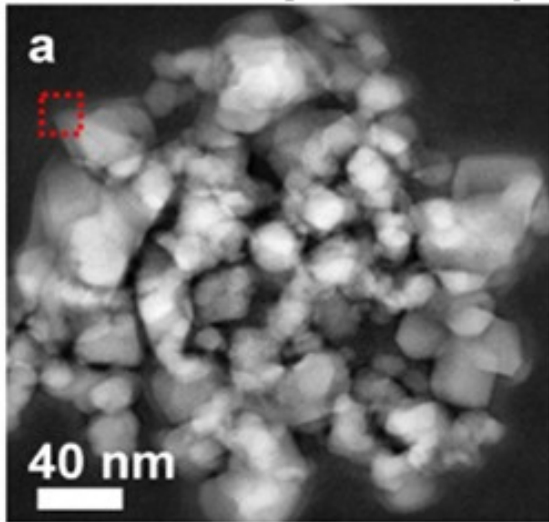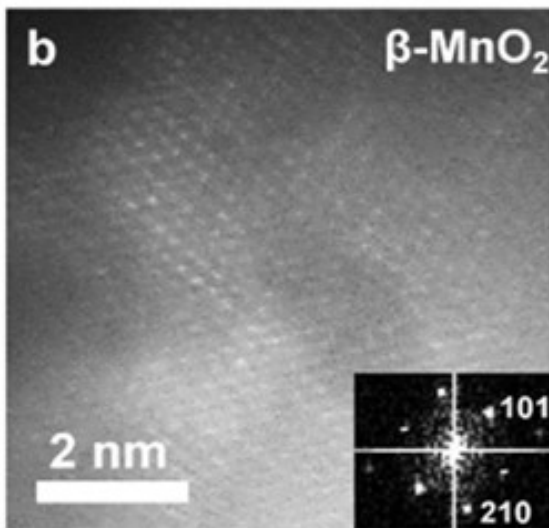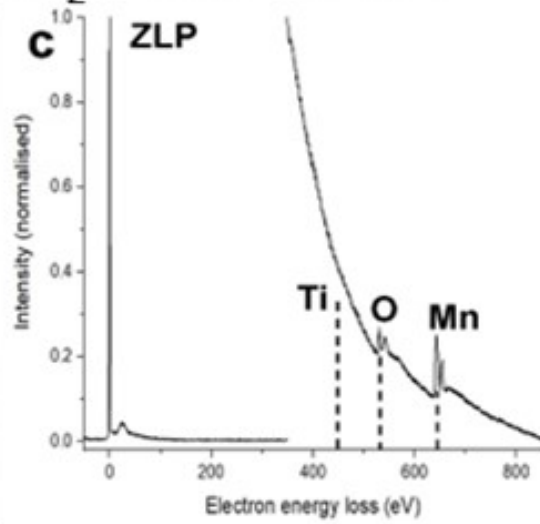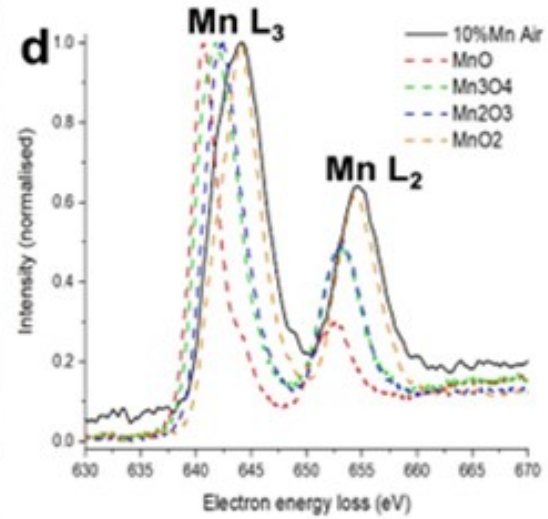

30%Mn:90%TiO<sub>2</sub> support – 500 ° C in H<sub>2</sub>

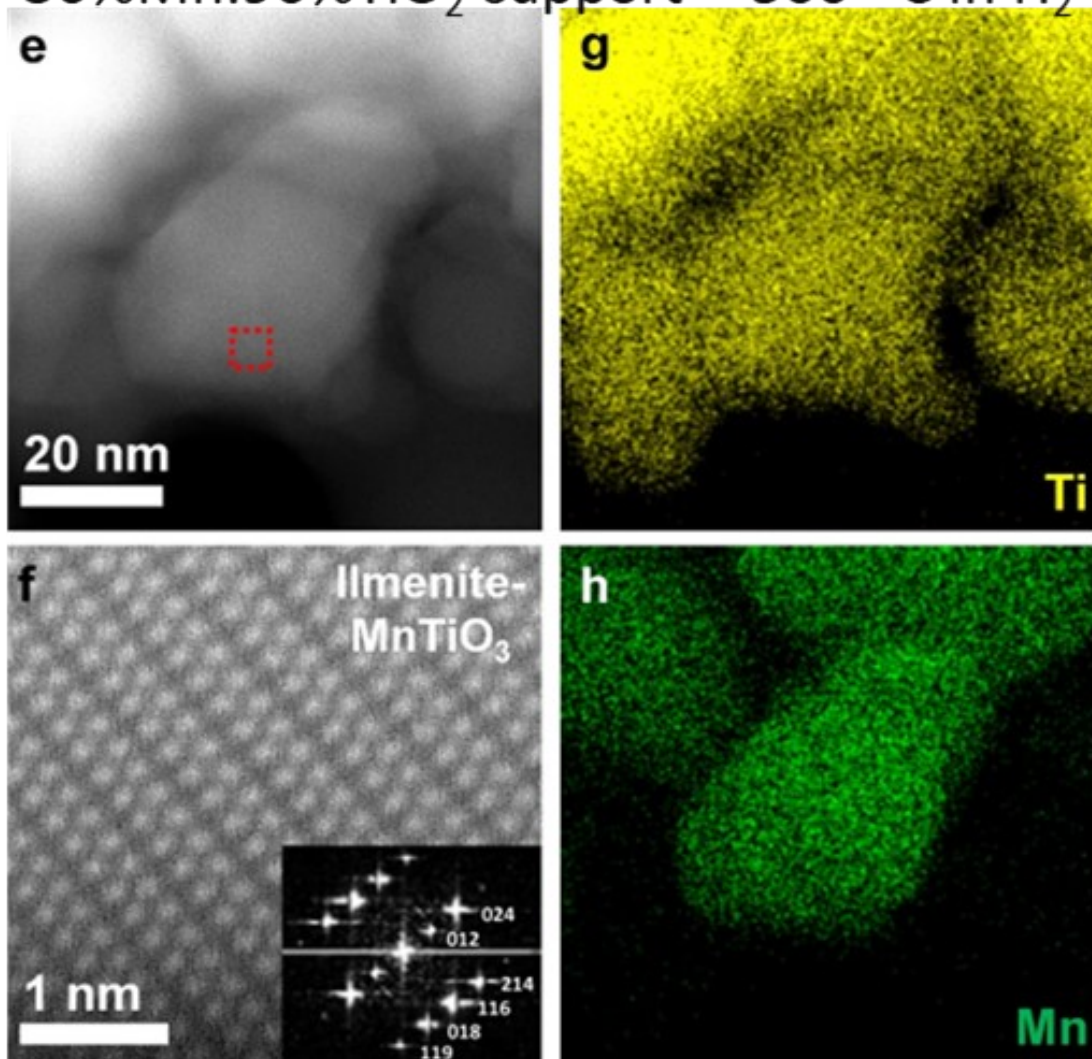

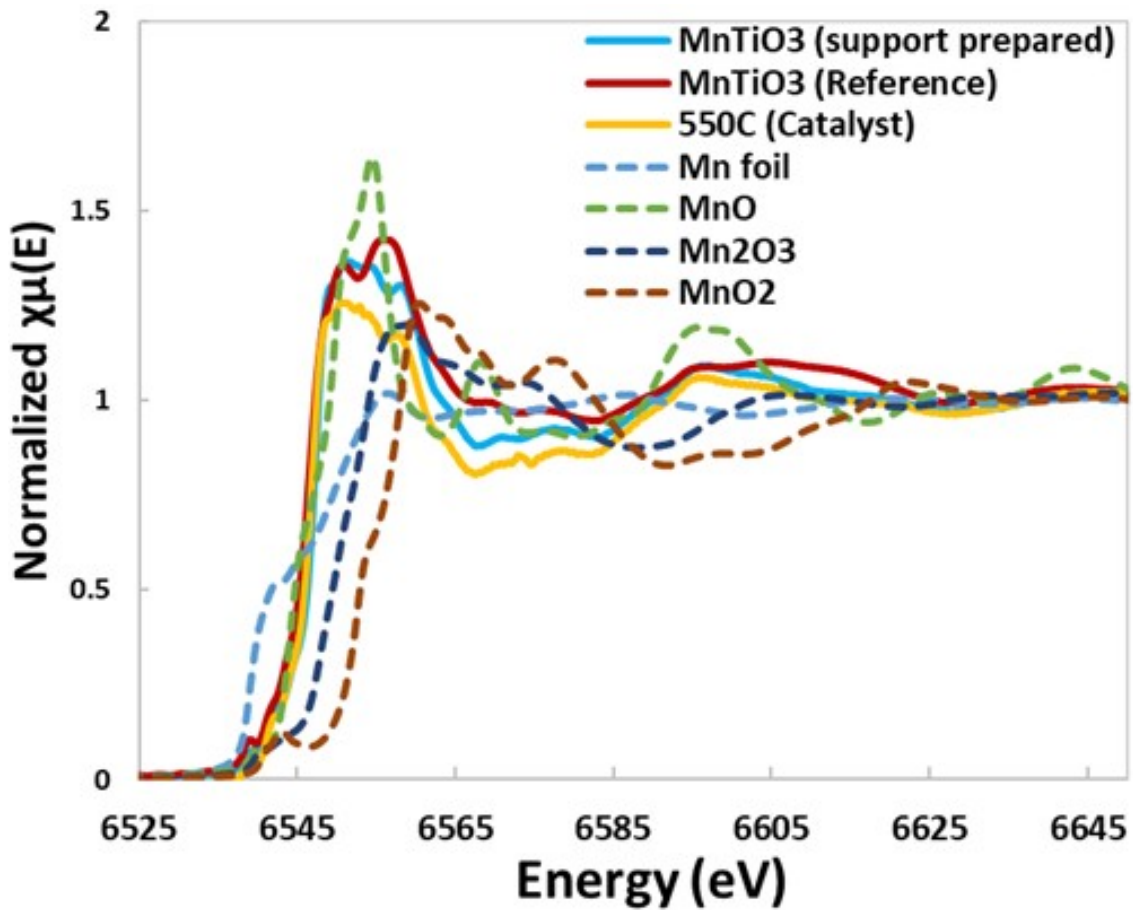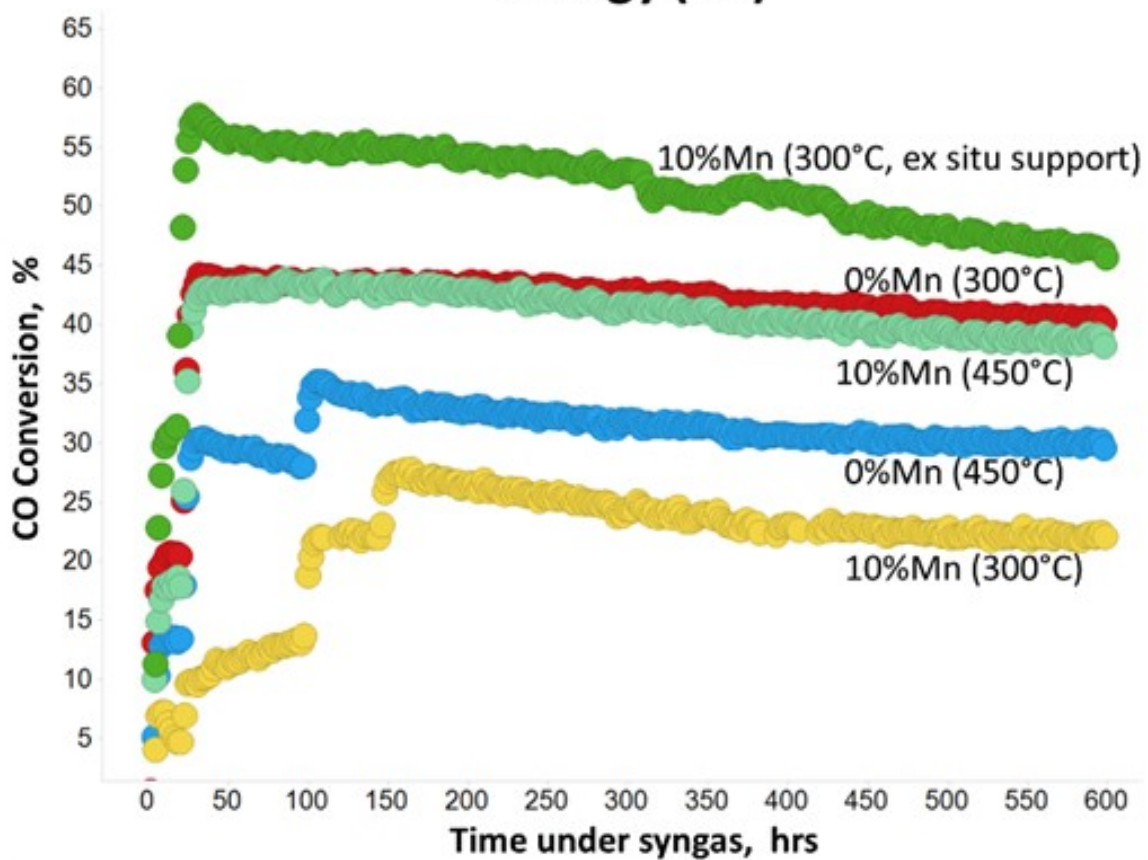

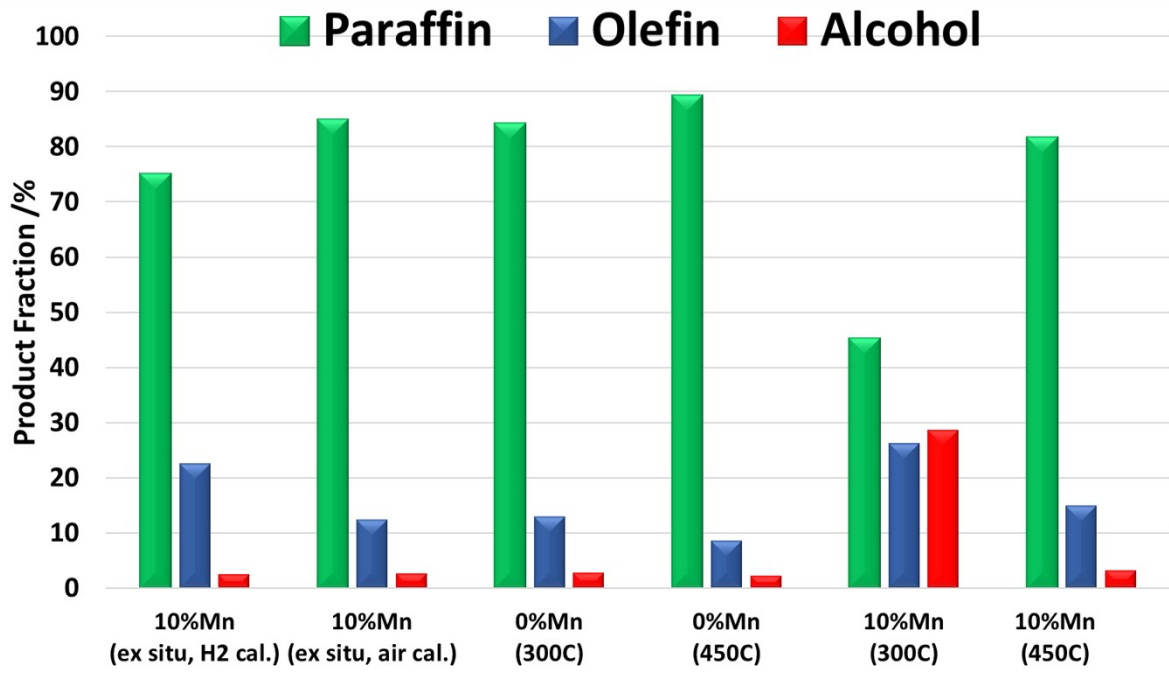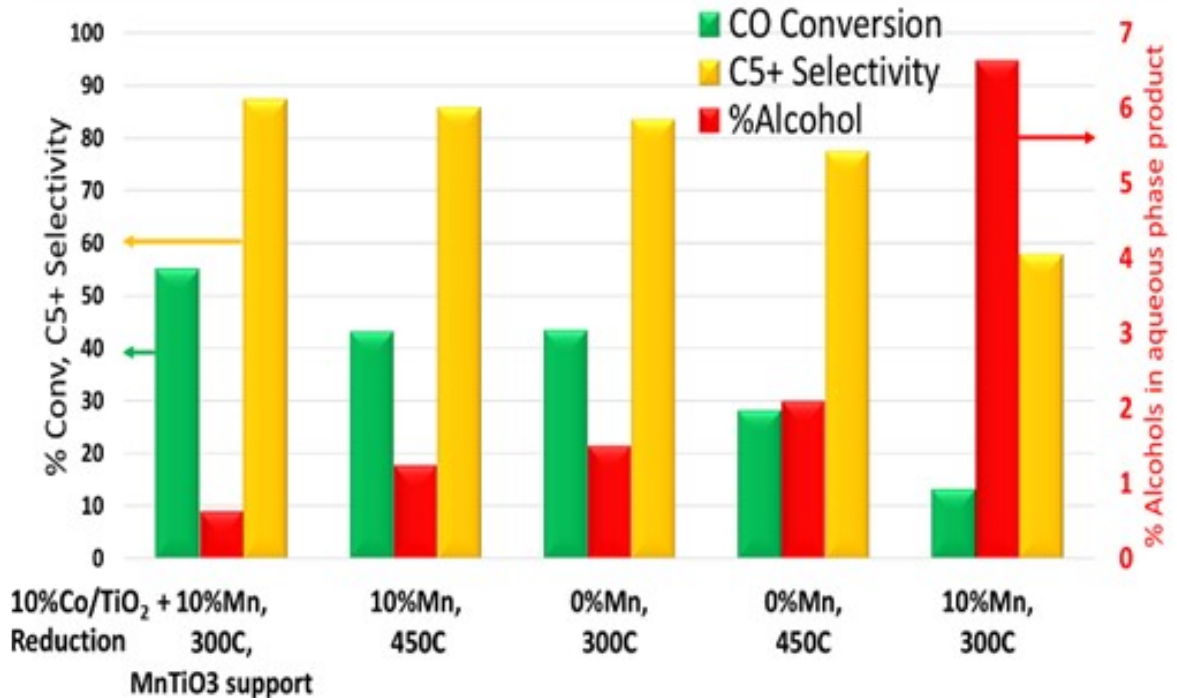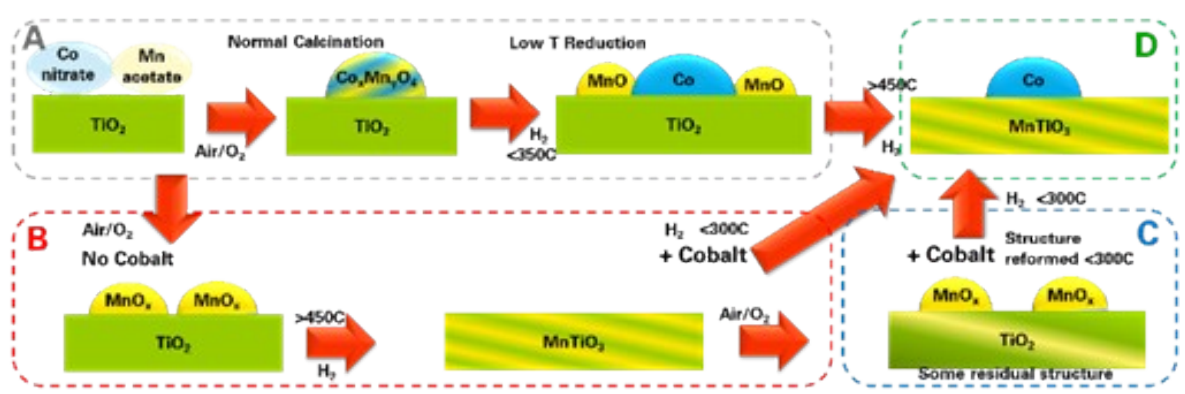

SI-12 – images from the main publication for easier viewing
